# Supplementary material for: Sea ice and mixed layer depth influence on nitrate depletion and associated isotopic effects in the Drake Passage – Weddell Sea region, Southern Ocean
Source: Copernicus journal article supplement (doi:10.5194/egusphere-2024-3687), 2024-12-06

DP

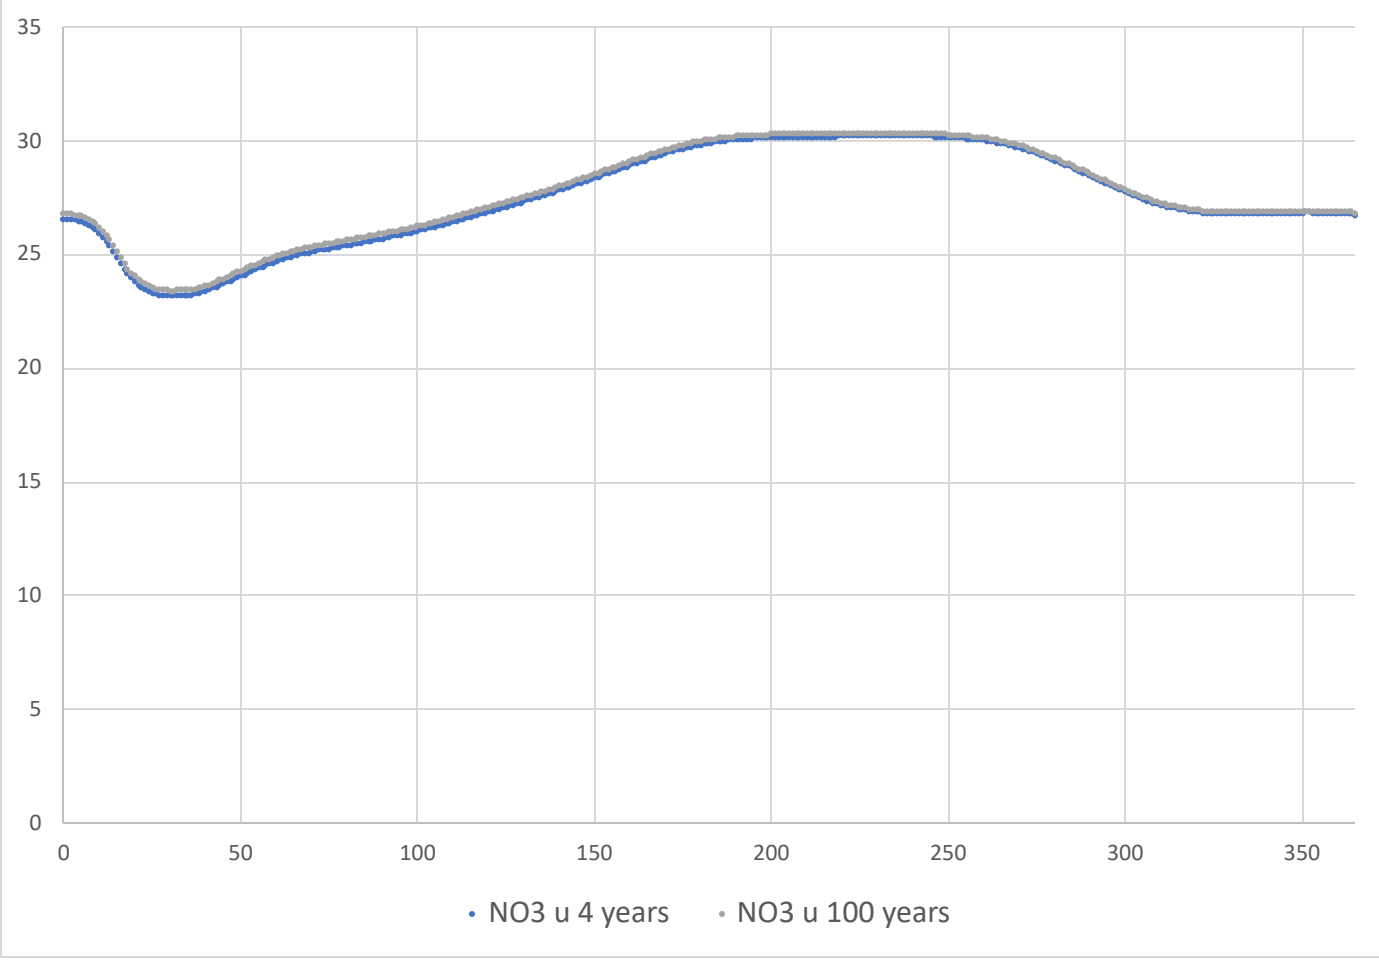

BS

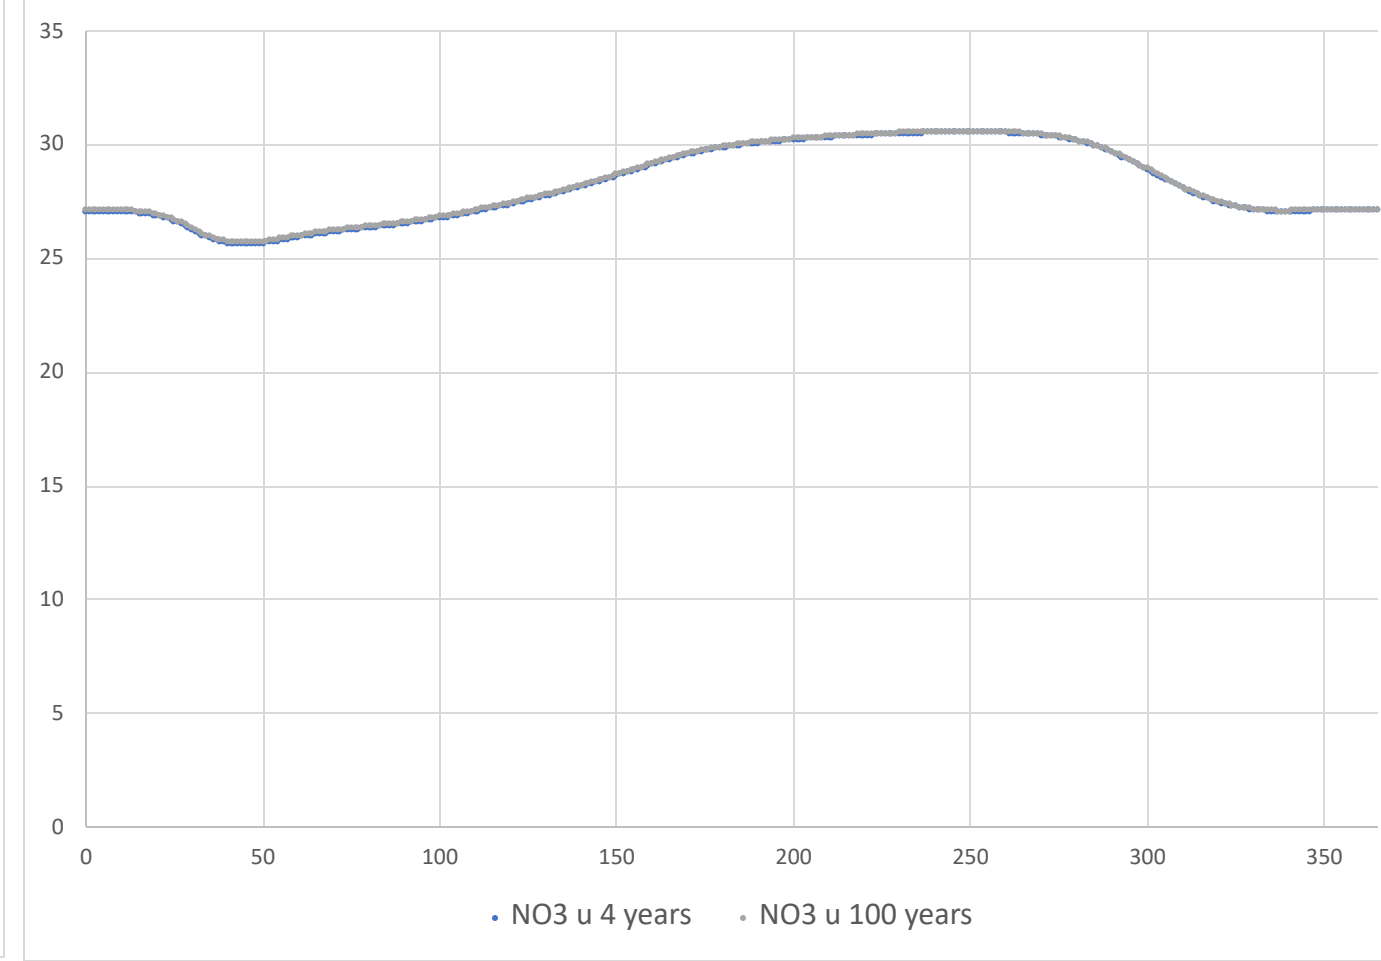

WS

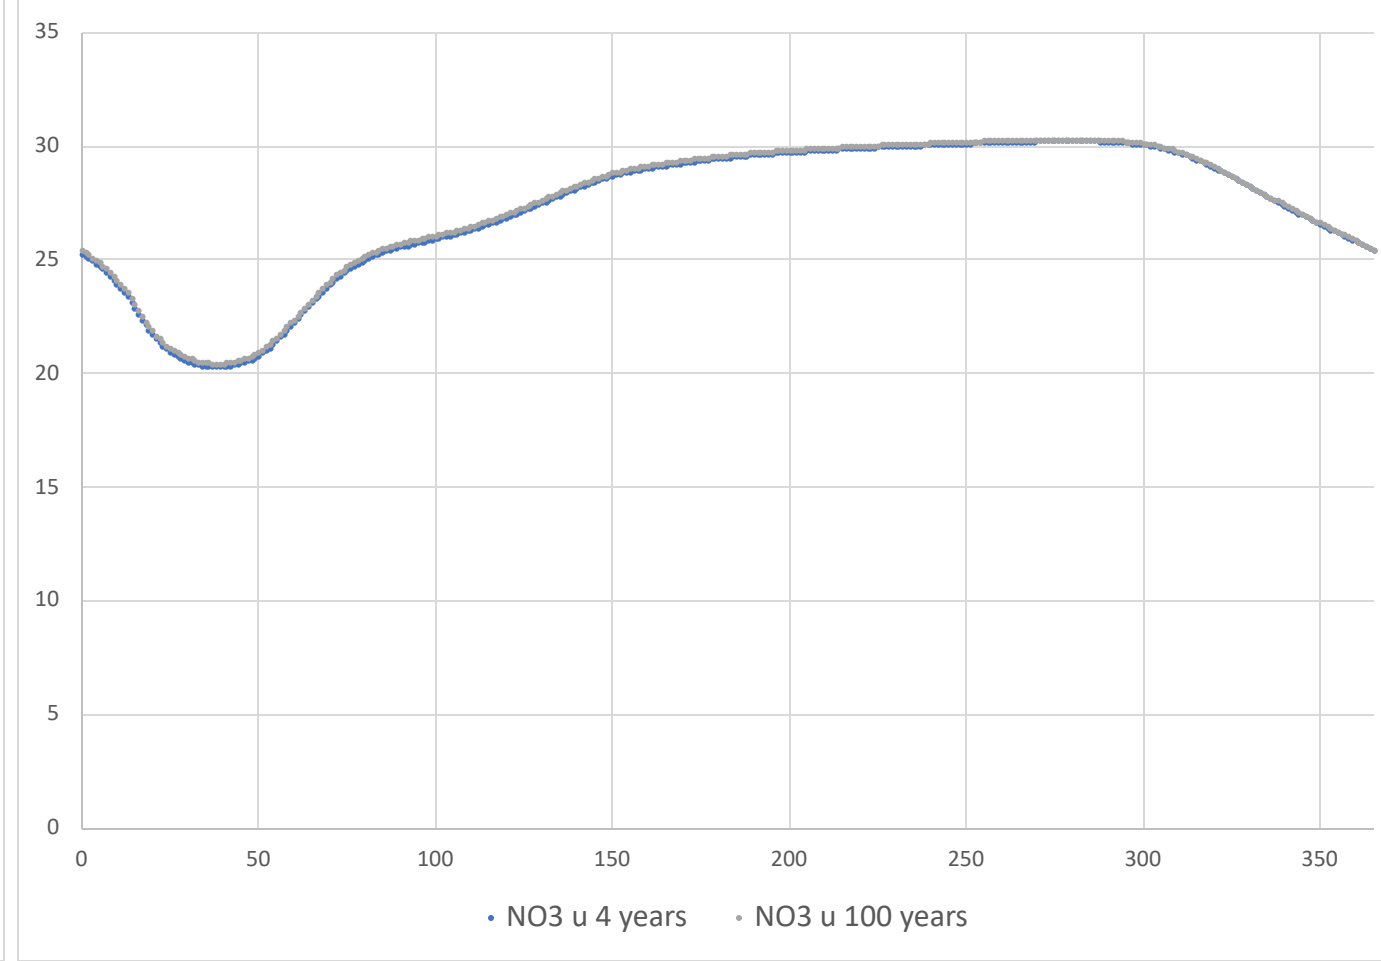

DP

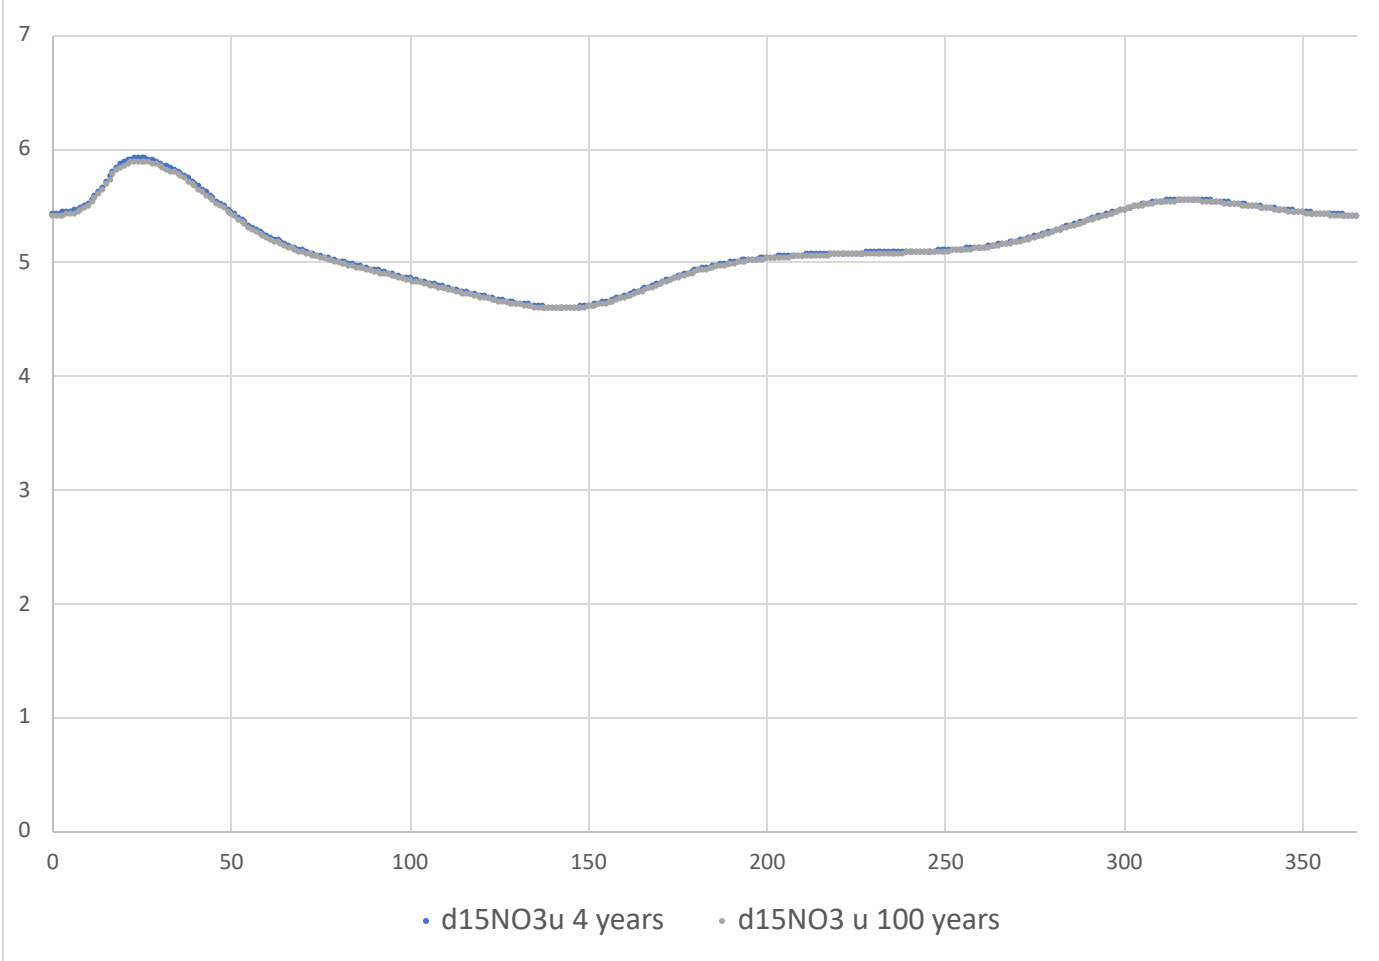

BS

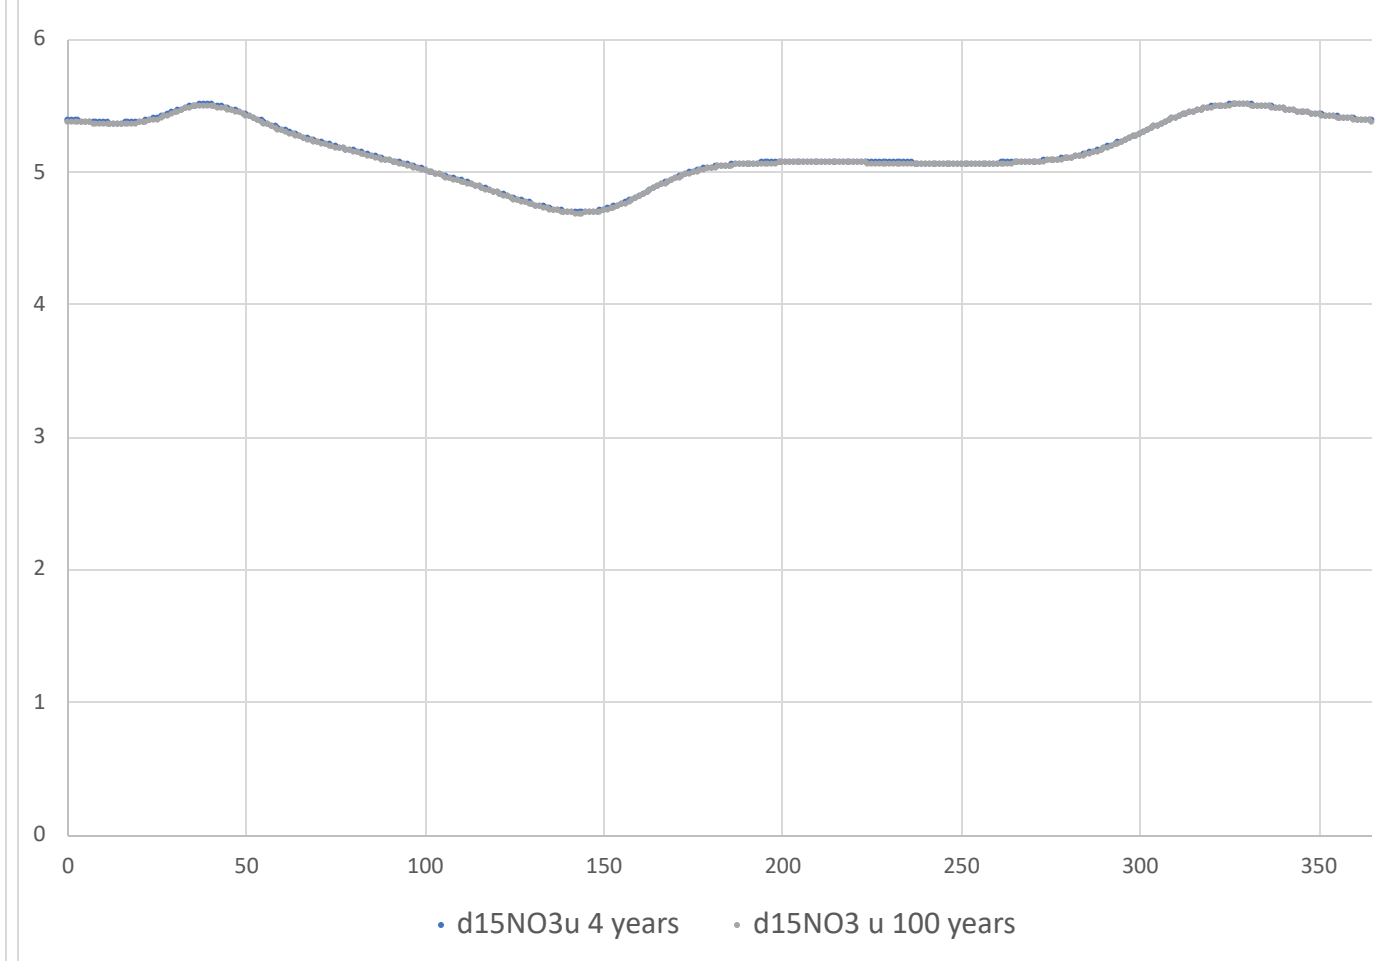

WS

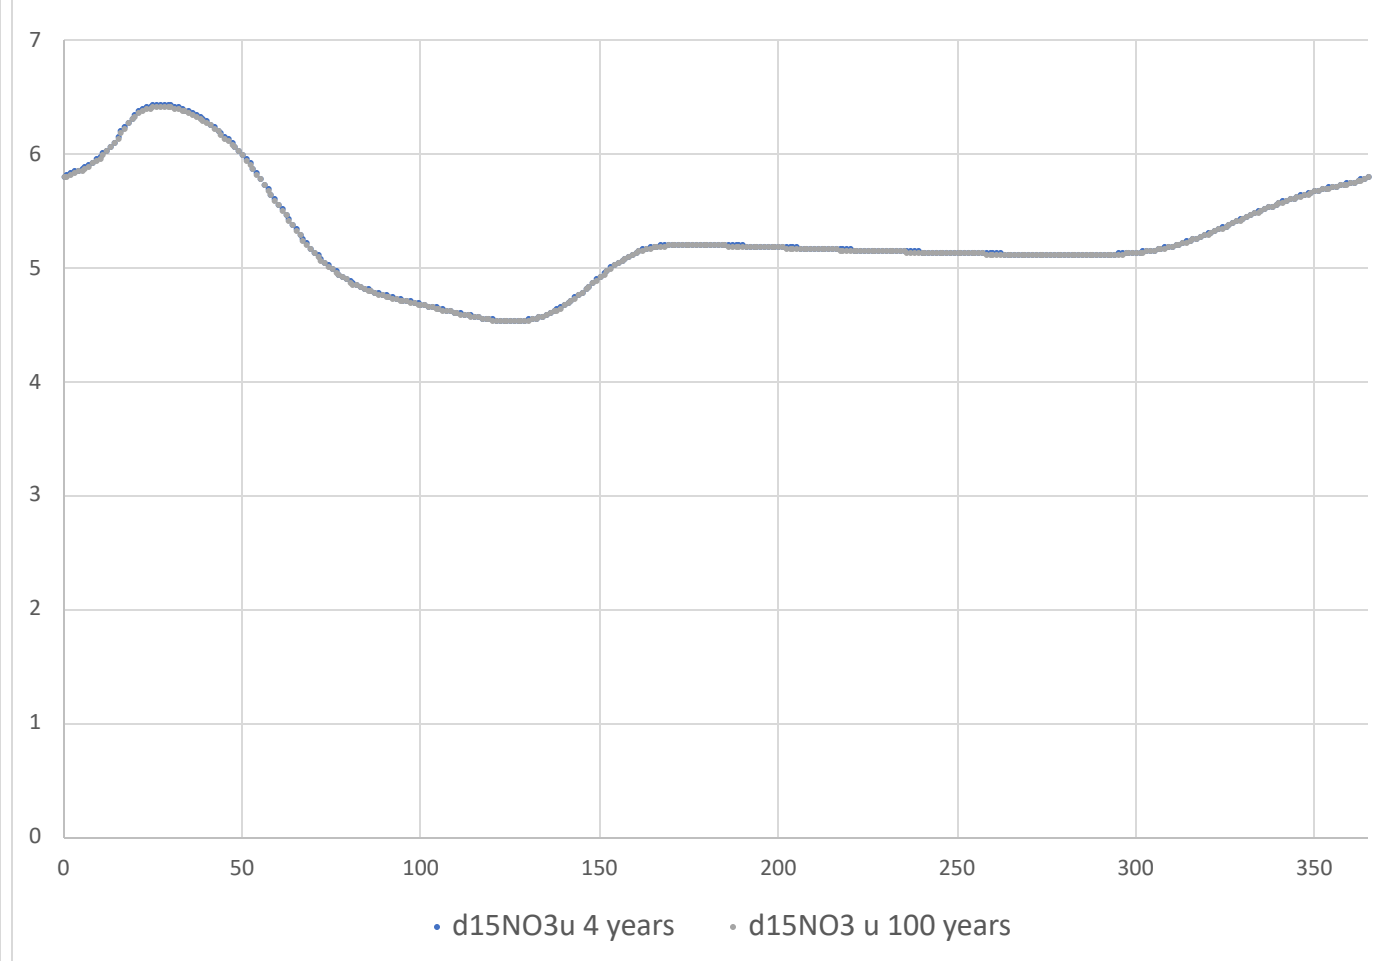

Supplement: Supplementary file [file egusphere-2024-3687-AC2-supplement.pdf]
